# Supplementary material for: Detailed molecular characterisation of acute myeloid leukaemia with a normal karyotype using targeted DNA capture
Source: PubMed Central journal article supplement (PMC3768109; doi:10.1038/leu.2013.117), 2013-05-24
Supplement: leu2013117x7.pdf [file leu2013117x7.pdf]

| Primer name            | Sequence                                                          |
|------------------------|-------------------------------------------------------------------|
| ASXL1_C594*_F          | TCACACAGTCCCACCAGAAA                                              |
| ASXL1_C594*_R          | CAGAGCACGGGCTTTAATGT                                              |
| ASXL1_G642fs*_F        | GAGGTCACCACTGCCATAGA                                              |
| ASXL1_G642fs*_R        | TACACTTTCCAGGGGTGCTC                                              |
| CEBPA_A111fs*_F        | CTTCA ACGA CGAGTTCTGGCCGA                                         |
| CEBPA_A111fs*_R        | AGCTGCTTGGCTTCATCCTCT                                             |
| CEBPA_T310NT_F         | TTGTCACTGGTCAGTCCAG                                               |
| CEBPA_T310NT_R         | TGGACAAGAACAGCAACGAG                                              |
| DNMT3A_R882C_F         | CCATGTCCTTACACACACG                                               |
| DNMT3A_R882C_R         | CTGAGTCCGGGTTGTTTAT                                               |
| DNMT3A_G590fs*_F       | CCCAGCACTCACAAATTCCT                                              |
| DNMT3A_G590fs*_R       | CAGGCAGCCATTAAGGAAGA                                              |
| FLT3_D835Y_F           | CCTGAAGCTGCAGAAAACC                                               |
| FLT3_D835Y_R           | TCCATCACCCGTACTCCTA                                               |
| IDH1_R132H_F           | ATTGTGCAGCCAGTGTGAA                                               |
| IDH1_R132H_R           | CGGTCTTCAGAGAAGCCATT                                              |
| IDH2_R140Q_F           | TGTGGCCTTGTACTGCAGAG                                              |
| IDH2_R140Q_R           | GACTCCAGAGCCACACATT                                               |
| IDH2_R172K_F           | TGTGGCCTTGTACTGCAGAG                                              |
| IDH2_R172K_R           | GACTCCAGAGCCACACATT                                               |
| KRAS_G12V_F            | AGAATGGTCTGCACCAGTAA                                              |
| KRAS_G12V_R            | CTTAAGCGTCGATGGAGGAG                                              |
| KRAS_K117N_F           | AGAAACCAAAGCCAAAAGCA                                              |
| KRAS_K117N_R           | TTGTGGACAGGTTTTGAAAGA                                             |
| NF1_intron_F           | TGCCATTTCTGTTGCCTTA                                               |
| NF1_intron_R           | TTCTGCTACCAATCAACACACA                                            |
| NPM1_ex12_F            | ATTGGCCATATGGGTCTCTG                                              |
| NPM1_ex12_R            | AACACGGTAGGGAAAGTTCTCA                                            |
| NRAS_G12D_F            | CACTGGGCCTCACCTCTATG                                              |
| NRAS_G12D_R            | GCCCAAGGACTGTTGAAAAA                                              |
| TET2_L119*_F           | GTTGAAATGTCAGGGCCAGT                                              |
| TET2_L119*_R           | CAAATTGCTGCCAGACTCAA                                              |
| TET2_P612fs*_F         | GAGGCATCACTGCCATCAAT                                              |
| TET2_P612fs*_R         | TGCTCCAGCTGTGTTGTTTT                                              |
| WT1_GATK_AML3_F        | TGCTCTAGACGGAGAGTCC                                               |
| WT1_GATK_AML3_+140R    | CAGGCCAGGATGTTTCCTAA                                              |
| FLT3-ITD_F             | GCAATTTAGGTATGAAAGCCAGC                                           |
| FLT3-ITD_R             | CTTTCAGCATTTTGACGGCAACC                                           |
| MLL_PTD_F              | TCCAGAGCAGAGCAAACAGA                                              |
| MLL_PTD_R              | TATGTGGCCTTTGGTTCTCC                                              |
| MiSeq_rs2736627_F1     | <b>ACACTCTTCCCTACACGACGCTCTCCGATCTCAGCTGATGAAGAACTTGCTTG</b>      |
| MiSeq_rs2736627_R1     | <b>TCGGCATTCTGCTGAACCGCTCTCCGATCTACCTTTGCCCCAGATTTCCAG</b>        |
| MiSeq_rs701848_F2      | <b>ACACTCTTCCCTACACGACGCTCTCCGATCTCCTACATGTGCTTTATTGATTTGC</b>    |
| MiSeq_rs701848_R2      | <b>TCGGCATTCTGCTGAACCGCTCTCCGATCTCCGCTTAAAATCGTATGAGT</b>         |
| MiSeq_rs1234213_F1     | <b>ACACTCTTCCCTACACGACGCTCTCCGATCTCCAAAGAAAGTGTAAAATGTGACTG</b>   |
| MiSeq_rs1234213_R1     | <b>TCGGCATTCTGCTGAACCGCTCTCCGATCTTCAAACAAAACAAGCTTTTCC</b>        |
| MiSeq_rs1234224_F1     | <b>ACACTCTTCCCTACACGACGCTCTCCGATCTTGAAGTGTGCGGAAAGTGA</b>         |
| MiSeq_rs1234224_R1     | <b>TCGGCATTCTGCTGAACCGCTCTCCGATCTCTGAGGGATTAGGGAAGGA</b>          |
| MiSeq_rs74146236_F2    | <b>TCGGCATTCTGCTGAACCGCTCTCCGATCTGGTTGACAGAGGGGAAAC</b>           |
| MiSeq_rs74146236_R2    | <b>TCGGCATTCTGCTGAACCGCTCTCCGATCTCCTCGAGATGCAAAAATTCCT</b>        |
| MiSeq_rs3895069_F1     | <b>ACACTCTTCCCTACACGACGCTCTCCGATCTTGGCAATAGGACATTGTGTC</b>        |
| MiSeq_rs3895069_R1     | <b>TCGGCATTCTGCTGAACCGCTCTCCGATCTTAAAACGGGAAAGTGCCATC</b>         |
| MiSeq_tag_F            | AATGATACGGGACACCGAGATCTACTCTTCCCTACACGACGCTCTCCGATC*T             |
| iPCRtagR1              | CAAGCAGAAGACGGCATAACGATGATGATCGGTCTCGGCATTCTGCTGAACCGCTCTCCGATC*T |
| iPCRtagR2              | CAAGCAGAAGACGGCATAACGATGATGATCGGTCTCGGCATTCTGCTGAACCGCTCTCCGATC*T |
| iPCRtagR3              | CAAGCAGAAGACGGCATAACGATGATGATCGGTCTCGGCATTCTGCTGAACCGCTCTCCGATC*T |
| iPCRtagR4              | CAAGCAGAAGACGGCATAACGATGATGATCGGTCTCGGCATTCTGCTGAACCGCTCTCCGATC*T |
| iPCRtagR5              | CAAGCAGAAGACGGCATAACGATGATGATCGGTCTCGGCATTCTGCTGAACCGCTCTCCGATC*T |
| iPCRtagR6              | CAAGCAGAAGACGGCATAACGATGATGATCGGTCTCGGCATTCTGCTGAACCGCTCTCCGATC*T |
| iPCRtagR7              | CAAGCAGAAGACGGCATAACGATGATGATCGGTCTCGGCATTCTGCTGAACCGCTCTCCGATC*T |
| iPCRtagR8              | CAAGCAGAAGACGGCATAACGATGATGATCGGTCTCGGCATTCTGCTGAACCGCTCTCCGATC*T |
| iPCRtagR9              | CAAGCAGAAGACGGCATAACGATGATGATCGGTCTCGGCATTCTGCTGAACCGCTCTCCGATC*T |
| iPCRtagR10             | CAAGCAGAAGACGGCATAACGATGATGATCGGTCTCGGCATTCTGCTGAACCGCTCTCCGATC*T |
| MiSeq_sequencing_oligo | AAGAGCGGTTACGACGGAATCCGAGACCGATCTC                                |

**Supplementary Table S1. Oligonucleotide primers used for validation of mutations**

Primers names reflect the mutations or SNPs they were used to test/validate
