# Supplementary material for: Detailed molecular characterisation of acute myeloid leukaemia with a normal karyotype using targeted DNA capture
Source: PubMed Central journal article supplement (PMC3768109; doi:10.1038/leu.2013.117), 2013-05-24
Supplement: leu2013117x9.pdf [file leu2013117x9.pdf]

| Mutation Caller | Sample | Chromosome | Position  | WTAllele | MutAllele | SomaticScore            | RefReads Normal | VariantReads Normal | Variant FreqNormal | RefReads Tumor | Variant Reads Tumor | Variant Freq Tumor | Gene_ID | Transcript_ID       | c.Annotation  | p.Annotation          | result     | ratio | Validated?       | method |
|-----------------|--------|------------|-----------|----------|-----------|-------------------------|-----------------|---------------------|--------------------|----------------|---------------------|--------------------|---------|---------------------|---------------|-----------------------|------------|-------|------------------|--------|
| MIDAS           | P3     | Chr1       | 115258747 | C        | T         | 0                       | 3724            | 0                   | 0.000268456        | 3060           | 1492                | 0.3270             | NRAS    | ENST00000369535_r69 | c.35G>A       | p.G12D                | MISSENSE   | (1/1) | Yes              | Sanger |
| SS              | P3     | Chr1       | 115258747 | C        | T         | 225                     | 3724            | 0                   | 0                  | 3060           | 1538                | 0.3334             | NRAS    | ENST00000369535_r69 | c.35G>A       | p.G12D                | MISSENSE   | (1/1) | Yes              | Sanger |
| VS_D            | P3     | Chr1       | 115258747 | C        | T         | 0                       | 3710            | 1                   | 0.000269469        | 3045           | 1523                | 0.3370             | NRAS    | ENST00000369535_r69 | c.35G>A       | p.G12D                | MISSENSE   | (1/1) | Yes              | Sanger |
| VS_HS           | P3     | Chr1       | 115258747 | C        | T         | 0                       | 3710            | 1                   | 0.000269469        | 3045           | 1523                | 0.3370             | NRAS    | ENST00000369535_r69 | c.35G>A       | p.G12D                | MISSENSE   | (1/1) | Yes              | Sanger |
| MIDAS           | P1     | Chr2       | 25457243  | G        | A         | 0                       | 1570            | 0                   | 0                  | 1001           | 796                 | 0.4430             | DNMT3A  | ENST00000380746_r69 | c.2077C>T     | p.R693C (R882C)       | MISSENSE   | (3/3) | Yes              | Sanger |
| SS              | P1     | Chr2       | 25457243  | G        | A         | 225                     | 1570            | 0                   | 0                  | 1001           | 831                 | 0.4534             | DNMT3A  | ENST00000380746_r69 | c.2077C>T     | p.R693C (R882C)       | MISSENSE   | (3/3) | Yes              | Sanger |
| VS_D            | P1     | Chr2       | 25457243  | G        | A         | 2.667547187685072E-269  | 1562            | 0                   | 0                  | 993            | 813                 | 0.4502             | DNMT3A  | ENST00000380746_r69 | c.2077C>T     | p.R693C (R882C)       | MISSENSE   | (3/3) | Yes              | Sanger |
| VS_HS           | P1     | Chr2       | 25457243  | G        | A         | 2.667547187685072E-269  | 1562            | 0                   | 0                  | 993            | 813                 | 0.4502             | DNMT3A  | ENST00000380746_r69 | c.2077C>T     | p.R693C (R882C)       | MISSENSE   | (3/3) | Yes              | Sanger |
| MIDAS           | P7     | Chr2       | 25467106  | C        | -         | 0                       | 0               | 0                   | 0                  | 1014           | 435                 | 0.3002             | DNMT3A  | ENST00000380746_r69 | c.1202G>      | p.G401fs*61 (G590fs*) | FRAMESHIFT | (3/3) | Yes              | Sanger |
| VS_D            | P7     | Chr2       | 25467105  | C        | -         | 2.6350030933505124E-151 | 1413            | 0                   | 0                  | 951            | 435                 | 0.3139             | DNMT3A  | ENST00000380746_r69 | c.1203G>      | p.G401fs*61 (G590fs*) | FRAMESHIFT | (3/3) | Yes              | Sanger |
| VS_HS           | P7     | Chr2       | 25467105  | C        | -         | 2.6350030933505124E-151 | 1413            | 0                   | 0                  | 951            | 435                 | 0.3139             | DNMT3A  | ENST00000380746_r69 | c.1203G>      | p.G401fs*61 (G590fs*) | FRAMESHIFT | (3/3) | Yes              | Sanger |
| MIDAS           | P5     | Chr2       | 20913112  | C        | T         | 0                       | 3916            | 1                   | 0.000510334        | 3274           | 2469                | 0.4298             | IDH1    | ENST00000345146_r69 | c.395G>A      | p.R132H               | MISSENSE   | (3/3) | Yes              | Sanger |
| SS              | P5     | Chr2       | 20913112  | C        | T         | 225                     | 3917            | 0                   | 0                  | 3274           | 2530                | 0.4356             | IDH1    | ENST00000345146_r69 | c.395G>A      | p.R132H               | MISSENSE   | (3/3) | Yes              | Sanger |
| VS_D            | P5     | Chr2       | 20913112  | C        | T         | 0                       | 3894            | 1                   | 0.000256739        | 3243           | 2511                | 0.4364             | IDH1    | ENST00000345146_r69 | c.395G>A      | p.R132H               | MISSENSE   | (3/3) | Yes              | Sanger |
| VS_HS           | P5     | Chr2       | 20913112  | C        | T         | 0                       | 3894            | 1                   | 0.000256739        | 3243           | 2511                | 0.4364             | IDH1    | ENST00000345146_r69 | c.395G>A      | p.R132H               | MISSENSE   | (3/3) | Yes              | Sanger |
| MIDAS           | P2     | Chr4       | 106158455 | T        | G         | 0                       | 3366            | 0                   | 0                  | 2247           | 1865                | 0.4536             | TET2    | ENST00000305737_r69 | c.3356T>G     | p.L1119*              | NONSENSE   | (4/4) | Yes              | Sanger |
| SS              | P2     | Chr4       | 106158455 | T        | G         | 225                     | 3366            | 0                   | 0                  | 2247           | 1902                | 0.4583             | TET2    | ENST00000305737_r69 | c.3356T>G     | p.L1119*              | NONSENSE   | (4/4) | Yes              | Sanger |
| VS_D            | P2     | Chr4       | 106158455 | T        | G         | 0                       | 3362            | 0                   | 0                  | 2243           | 1888                | 0.4570             | TET2    | ENST00000305737_r69 | c.3356T>G     | p.L1119*              | NONSENSE   | (4/4) | Yes              | Sanger |
| VS_HS           | P2     | Chr4       | 106158455 | T        | G         | 0                       | 3362            | 0                   | 0                  | 2243           | 1888                | 0.4570             | TET2    | ENST00000305737_r69 | c.3356T>G     | p.L1119*              | NONSENSE   | (4/4) | Yes              | Sanger |
| MIDAS           | P1     | Chr5       | 170837544 | -        | TCTG      | 0                       | 0               | 1                   | 0                  | 1449           | 616                 | 0.2983             | NPM1    | ENST00000517671_r69 | c.860>TCTG    | p.L287fs*13           | FRAMESHIFT | (3/3) | Yes              | Sanger |
| VS_D            | P1     | Chr5       | 170837543 | -        | TCTG      | 6.582920250438554E-227  | 2203            | 1                   | 0.000453721        | 1329           | 614                 | 0.3160             | NPM1    | ENST00000517671_r69 | c.859>TCTG    | p.L287fs*13           | FRAMESHIFT | (3/3) | Yes              | Sanger |
| VS_HS           | P1     | Chr5       | 170837543 | -        | TCTG      | 6.582920250438554E-227  | 2203            | 1                   | 0.000453721        | 1329           | 614                 | 0.3160             | NPM1    | ENST00000517671_r69 | c.859>TCTG    | p.L287fs*13           | FRAMESHIFT | (3/3) | Yes              | Sanger |
| MIDAS           | P4     | Chr5       | 170837544 | -        | TCTG      | 0                       | 0               | 1                   | 0                  | 1180           | 456                 | 0.2787             | NPM1    | ENST00000517671_r69 | c.860>TCTG    | p.L287fs*13           | FRAMESHIFT | (3/3) | Yes              | Sanger |
| VS_D            | P4     | Chr5       | 170837543 | -        | TCTG      | 6.761909647462354E-194  | 2203            | 1                   | 0.000453721        | 1088           | 456                 | 0.2953             | NPM1    | ENST00000517671_r69 | c.859>TCTG    | p.L287fs*13           | FRAMESHIFT | (3/3) | Yes              | Sanger |
| VS_HS           | P4     | Chr5       | 170837543 | -        | TCTG      | 6.761909647462354E-194  | 2203            | 1                   | 0.000453721        | 1088           | 456                 | 0.2953             | NPM1    | ENST00000517671_r69 | c.859>TCTG    | p.L287fs*13           | FRAMESHIFT | (3/3) | Yes              | Sanger |
| MIDAS           | P4Rel  | Chr5       | 170837544 | -        | TCTG      | 0                       | 0               | 1                   | 0                  | 1912           | 401                 | 0.1734             | NPM1 ‡  | ENST00000517671_r69 | c.860>TCTG    | p.L287fs*13           | FRAMESHIFT | (3/3) | Yes              | Sanger |
| VS_HS           | P4Rel  | Chr5       | 170837543 | -        | TCTG      | 3.733283817427552E-127  | 2203            | 1                   | 0.000453721        | 1804           | 399                 | 0.1811             | NPM1 ‡  | ENST00000517671_r69 | c.859>TCTG    | p.L287fs*13           | FRAMESHIFT | (3/3) | Yes              | Sanger |
| VS_D            | P5     | Chr5       | 170837543 | -        | TCTG      | 3.300468663291457E-246  | 2203            | 1                   | 0.000453721        | 1829           | 830                 | 0.3121             | NPM1    | ENST00000517671_r69 | c.859>TCTG    | p.L287fs*13           | FRAMESHIFT | (3/3) | Yes              | Sanger |
| VS_HS           | P5     | Chr5       | 170837543 | -        | TCTG      | 3.300468663291457E-246  | 2203            | 1                   | 0.000453721        | 1829           | 830                 | 0.3121             | NPM1    | ENST00000517671_r69 | c.859>TCTG    | p.L287fs*13           | FRAMESHIFT | (3/3) | Yes              | Sanger |
| MIDAS           | P3     | Chr11      | 32456253  | -        | GGCAATA   | 0                       | 0               | 1                   | 0                  | 302            | 87                  | 0.2237             | WT1     | ENST00000332351_r69 | c.639>TATTCCG | p.N214fs*36           | FRAMESHIFT | (3/3) | Yes              | Sanger |
| VS_D            | P3     | Chr11      | 32456252  | -        | GGCAATA   | 3.80673628861356E-30    | 405             | 0                   | 0                  | 301            | 87                  | 0.2242             | WT1     | ENST00000332351_r69 | c.640>TATTCCG | p.N214fs*36           | FRAMESHIFT | (3/3) | Yes              | Sanger |
| VS_HS           | P3     | Chr11      | 32456252  | -        | GGCAATA   | 3.80673628861356E-30    | 405             | 0                   | 0                  | 301            | 87                  | 0.2242             | WT1     | ENST00000332351_r69 | c.640>TATTCCG | p.N214fs*36           | FRAMESHIFT | (3/3) | Yes              | Sanger |
| MIDAS           | P4     | Chr11      | 32456486  | G        | A         | 0                       | 333             | 0                   | 0                  | 152            | 98                  | 0.3920             | WT1     | ENST00000332351_r69 | c.406C>T      | p.P136S               | MISSENSE   | (3/3) | Assumed germline |        |
| SS              | P4     | Chr11      | 32456486  | G        | A         | 210                     | 333             | 0                   | 0                  | 152            | 150                 | 0.4934             | WT1     | ENST00000332351_r69 | c.406C>T      | p.P136S               | MISSENSE   | (3/3) | Assumed germline |        |
| VS_D            | P4     | Chr11      | 32456486  | G        | A         | 1.074039345730627E-54   | 320             | 0                   | 0                  | 145            | 133                 | 0.4784             | WT1     | ENST00000332351_r69 | c.406C>T      | p.P136S               | MISSENSE   | (3/3) | Assumed germline |        |
| VS_HS           | P4     | Chr11      | 32456486  | G        | A         | 1.074039345730627E-54   | 320             | 0                   | 0                  | 145            | 133                 | 0.4784             | WT1     | ENST00000332351_r69 | c.406C>T      | p.P136S               | MISSENSE   | (3/3) | Assumed germline |        |
| MIDAS           | P4Rel  | Chr11      | 32456486  | G        | A         | 0                       | 333             | 0                   | 0                  | 160            | 99                  | 0.3822             | WT1     | ENST00000332351_r69 | c.406C>T      | p.P136S               | MISSENSE   | (3/3) | Assumed germline |        |
| SS              | P4Rel  | Chr11      | 32456486  | G        | A         | 225                     | 333             | 0                   | 0                  | 160            | 166                 | 0.5030             | WT1     | ENST00000332351_r69 | c.406C>T      | p.P136S               | MISSENSE   | (3/3) | Assumed germline |        |
| VS_D            | P4Rel  | Chr11      | 32456486  | G        | A         | 1.0889005961944242E-56  | 320             | 0                   | 0                  | 156            | 145                 | 0.4817             | WT1     | ENST00000332351_r69 | c.406C>T      | p.P136S               | MISSENSE   | (3/3) | Assumed germline |        |
| VS_HS           | P4Rel  | Chr11      | 32456486  | G        | A         | 1.0889005961944242E-56  | 320             | 0                   | 0                  | 156            | 145                 | 0.4817             | WT1     | ENST00000332351_r69 | c.406C>T      | p.P136S               | MISSENSE   | (3/3) | Assumed germline |        |
| MIDAS           | P2     | Chr12      | 25378647  | T        | A         | 0                       | 2771            | 0                   | 0                  | 1954           | 1437                | 0.4238             | KRAS    | ENST0000031936_r69  | c.351A>T      | p.K117N               | MISSENSE   | (2/2) | Yes              | Sanger |
| SS              | P2     | Chr12      | 25378647  | T        | A         | 225                     | 2771            | 0                   | 0                  | 1954           | 1437                | 0.4238             | KRAS    | ENST0000031936_r69  | c.351A>T      | p.K117N               | MISSENSE   | (2/2) | Yes              | Sanger |
| VS_D            | P2     | Chr12      | 25378647  | T        | A         | 0                       | 2767            | 1                   | 0.000361272        | 1943           | 1445                | 0.4265             | KRAS    | ENST0000031936_r69  | c.351A>T      | p.K117N               | MISSENSE   | (2/2) | Yes              | Sanger |
| VS_HS           | P2     | Chr12      | 25378647  | T        | A         | 0                       | 2767            | 1                   | 0.000361272        | 1943           | 1445                | 0.4265             | KRAS    | ENST0000031936_r69  | c.351A>T      | p.K117N               | MISSENSE   | (2/2) | Yes              | Sanger |
| MIDAS           | P6     | Chr12      | 25398284  | C        | A         | 0                       | 2619            | 0                   | 0.000381679        | 1326           | 742                 | 0.3588             | KRAS    | ENST0000031936_r69  | c.35G>T       | p.G12V                | MISSENSE   | (2/2) | Yes              | Sanger |
| SS              | P6     | Chr12      | 25398284  | C        | A         | 225                     | 2619            | 0                   | 0                  | 1326           | 760                 | 0.3638             | KRAS    | ENST0000031936_r69  | c.35G>T       | p.G12V                | MISSENSE   | (2/2) | Yes              | Sanger |
| VS_D            | P6     | Chr12      | 25398284  | C        | A         | 6.820621128995054E-305  | 2596            | 1                   | 0.00038506         | 1309           | 752                 | 0.3649             | KRAS    | ENST0000031936_r69  | c.35G>T       | p.G12V                | MISSENSE   | (2/2) | Yes              | Sanger |
| VS_HS           | P6     | Chr12      | 25398284  | C        | A         | 6.820621128995054E-305  | 2596            | 1                   | 0.00038506         | 1309           | 752                 | 0.3649             | KRAS    | ENST0000031936_r69  | c.35G>T       | p.G12V                | MISSENSE   | (2/2) | Yes              | Sanger |
| MIDAS           | P1     | Chr13      | 28592642  | C        | A         | 0                       | 2708            | 0                   | 0                  | 1979           | 1217                | 0.3808             | FLT3    | ENST00000241453_r69 | c.2503G>T     | p.D835Y               | MISSENSE   | (1/1) | Yes              | Sanger |
| SS              | P1     | Chr13      | 28592642  | C        | A         | 225                     | 2708            | 0                   | 0                  | 1981           | 1305                | 0.3974             | FLT3    | ENST00000241453_r69 | c.2503G>T     | p.D835Y               | MISSENSE   | (1/1) | Yes              | Sanger |
| VS_D            | P1     | Chr13      | 28592642  | C        | A         | 0                       | 2672            | 0                   | 0                  | 1949           | 1272                | 0.3949             | FLT3    | ENST00000241453_r69 | c.2503G>T     | p.D835Y               | MISSENSE   | (1/1) | Yes              | Sanger |
| VS_HS           | P1     | Chr13      | 28592642  | C        | A         | 0                       | 2672            | 0                   | 0                  | 1949           | 1272                | 0.3949             | FLT3    | ENST00000241453_r69 | c.2503G>T     | p.D835Y               | MISSENSE   | (1/1) | Yes              | Sanger |
| MIDAS           | P5     | Chr13      | 28592642  | C        | A         | 0                       | 2708            | 0                   | 0                  | 3370           | 1432                | 0.2982             | FLT3    | ENST00000241453_r69 | c.2503G>T     | p.D835Y               | MISSENSE   | (1/1) | Yes              | Sanger |
| SS              | P5     | Chr13      | 28592642  | C        | A         | 225                     | 2708            | 0                   | 0                  | 3370           | 1547                | 0.3144             | FLT3    | ENST00000241453_r69 | c.2503G>T     | p.D835Y               | MISSENSE   | (1/1) | Yes              | Sanger |
| VS_D            | P5     | Chr13      | 28592642  | C        | A         | 0                       | 2672            | 0                   | 0                  | 3289           | 1512                | 0.3149             | FLT3    | ENST00000241453_r69 | c.2503G>T     | p.D835Y               | MISSENSE   | (1/1) | Yes              | Sanger |
| VS_HS           | P5     | Chr13      | 28592642  | C        | A         | 0                       | 2672            | 0                   | 0                  | 3289           | 1512                | 0.3149             | FLT3    | ENST00000241453_r69 | c.2503G>T     | p.D835Y               | MISSENSE   | (1/1) | Yes              | Sanger |
| SS              | P5     | Chr15      | 90628533  | T        | G         | 7                       | 43              | 0                   | 0                  | 47             | 31                  | 0.3974             | IDH2    | ENST00000330062_r69 | c.1054A>C     | p.T352P               | MISSENSE   | (1/1) | No (MiSeq)       |        |
| MIDAS           | P7     | Chr15      | 90631838  | C        | T         | 0                       | 1663            | 1                   | 0.00060962         | 1301           | 549                 | 0.2968             | IDH2    | ENST00000330062_r69 | c.515G>A      | p.R172K               | MISSENSE   | (1/1) | Yes              | Sanger |
| SS              | P7     | Chr15      | 90631838  | C        | T         | 225                     | 1663            | 0                   | 0                  | 1301           | 563                 | 0.3019             | IDH2    | ENST00000330062_r69 | c.515G>A      | p.R172K               | MISSENSE   | (1/1) | Yes              | Sanger |
| VS_D            | P7     | Chr15      | 90631838  | C        | T         | 4.825704787591387E-174  | 1657            | 1                   | 0.000603136        | 1292           | 559                 | 0.3020             | IDH2    | ENST00000330062_r69 | c.515G>A      | p.R172K               | MISSENSE   | (1/1) | Yes              | Sanger |
| VS_HS           | P7     | Chr15      | 90631838  | C        | T         | 4.825704787591387E-174  | 1657            | 1                   | 0.000603136        | 1292           | 559                 | 0.3020             | IDH2    | ENST00000330062_r69 | c.515G>A      | p.R172K               | MISSENSE   | (1/1) | Yes              | Sanger |
| MIDAS           | P4     | Chr15      | 90631934  | C        | T         | 0                       | 2007            | 1                   | 0.000498008        | 1092           | 750                 | 0.4072             | IDH2    | ENST00000330062_r69 | c.419G>A      | p.R140Q               | MISSENSE   | (1/1) | Yes              | Sanger |
| SS              | P4     | Chr15      | 90631934  | C        | T         | 225                     | 2007            |                     |                    |                |                     |                    |         |                     |               |                       |            |       |                  |        |
