# Supplementary material for: Detailed molecular characterisation of acute myeloid leukaemia with a normal karyotype using targeted DNA capture
Source: PubMed Central journal article supplement (PMC3768109; doi:10.1038/leu.2013.117), 2013-05-24
Supplement: leu2013117x10.pdf [file leu2013117x10.pdf]

| SNP_ID     | Sample   | Chromosome | Position | Allele 1 | Allele 2 | Allele1_reads | Allele2_reads | Genotype | Allele read Ratio | A      | C      | G      | T      | Evidence for copy number loss |
|------------|----------|------------|----------|----------|----------|---------------|---------------|----------|-------------------|--------|--------|--------|--------|-------------------------------|
| rs2736627  | Ctrl DNA | Chr10      | 89721094 | C        | T        | 4312          | 299676        | T/T      | 0.9858            | 41     | 4312   | 173    | 299676 |                               |
| rs2736627  | P2_CR    | Chr10      | 89721094 | C        | T        | 154448        | 145284        | C/T      | <b>0.4847</b>     | 51     | 154448 | 132    | 145284 |                               |
| rs2736627  | P2       | Chr10      | 89721094 | C        | T        | 123129        | 530187        | C/T      | <b>0.1115</b>     | 80     | 123129 | 362    | 530187 | YES*                          |
| rs2736627  | P6       | Chr10      | 89721094 | C        | T        | 7766          | 397232        | T/T      | 0.9808            | 58     | 7766   | 253    | 397232 | non-informative               |
| rs701848   | Ctrl DNA | Chr10      | 89726745 | T        | C        | 347811        | 1504          | T/T      | 0.0043            | 129    | 1504   | 365    | 347811 |                               |
| rs701848   | P2_CR    | Chr10      | 89726745 | T        | C        | 198875        | 96362         | C/T      | <b>0.3264</b>     | 161    | 96362  | 283    | 198875 |                               |
| rs701848   | P2       | Chr10      | 89726745 | T        | C        | 155733        | 293234        | C/T      | <b>0.6531</b>     | 364    | 293234 | 254    | 155733 | YES*                          |
| rs701848   | P6       | Chr10      | 89726745 | T        | C        | 35164         | 276283        | C/T      | 0.8871            | 289    | 276283 | 156    | 35164  | YES**                         |
| rs1234213  | Ctrl DNA | Chr10      | 89689321 | G        | A        | 74251         | 69217         | G/A      | 0.4825            | 69217  | 50     | 74251  | 28     |                               |
| rs1234213  | P2_CR    | Chr10      | 89689321 | G        | A        | 196442        | 160           | G/G      | 0.0008            | 160    | 6      | 196442 | 33     |                               |
| rs1234213  | P2       | Chr10      | 89689321 | G        | A        | 39            | 2             | failed   | 0.0488            | 2      | 0      | 39     | 0      | non-informative               |
| rs1234213  | P6       | Chr10      | 89689321 | G        | A        | 162432        | 1178          | G/G      | 0.0072            | 1178   | 8      | 162432 | 17     | non-informative               |
| rs1234224  | Ctrl DNA | Chr10      | 89675296 | A        | G        | 187029        | 170892        | A/G      | 0.4775            | 187029 | 203    | 170892 | 323    |                               |
| rs1234224  | P2_CR    | Chr10      | 89675296 | A        | G        | 412405        | 1089          | A/A      | 0.0026            | 412405 | 338    | 1089   | 441    |                               |
| rs1234224  | P2       | Chr10      | 89675296 | A        | G        | 889901        | 2079          | A/A      | 0.0023            | 889901 | 680    | 2079   | 930    | non-informative               |
| rs1234224  | P6       | Chr10      | 89675296 | A        | G        | 608682        | 3702          | A/A      | 0.0060            | 608682 | 527    | 3702   | 643    | non-informative               |
| rs74146236 | Ctrl DNA | Chr10      | 89705221 | A        | G        | 399324        | 992           | A/A      | 0.0025            | 399324 | 210    | 992    | 56     |                               |
| rs74146236 | P2_CR    | Chr10      | 89705221 | A        | G        | 389274        | 764           | A/A      | 0.0020            | 389274 | 223    | 764    | 39     |                               |
| rs74146236 | P2       | Chr10      | 89705221 | A        | G        | 732426        | 1740          | A/A      | 0.0024            | 732426 | 484    | 1740   | 110    | non-informative               |
| rs74146236 | P6       | Chr10      | 89705221 | A        | G        | 573884        | 1386          | A/A      | 0.0024            | 573884 | 354    | 1386   | 99     | non-informative               |
| rs3895069  | Ctrl DNA | Chr10      | 89725454 | T        | G        | 273784        | 99            | T/T      | 0.0004            | 29     | 48     | 99     | 273784 |                               |
| rs3895069  | P2_CR    | Chr10      | 89725454 | T        | G        | 307710        | 63            | T/T      | 0.0002            | 12     | 36     | 63     | 307710 |                               |
| rs3895069  | P2       | Chr10      | 89725454 | T        | G        | 519848        | 103           | T/T      | 0.0002            | 14     | 46     | 103    | 519848 | non-informative               |
| rs3895069  | P6       | Chr10      | 89725454 | T        | G        | 374651        | 103           | T/T      | 0.0003            | 24     | 43     | 103    | 374651 | non-informative               |

**Supplementary Table S4:** Analysis of allelic read counts at known SNP positions within the PTEN locus supports the presence of deletions in samples P2 and P6

\* Allelic read ratios from sample P2 differ significantly from those of its matched normal samples P2\_CR, confirming the presence of a subclonal deletion of the "C" allele at this locus

\*\* Sample P6 was non-informative (homozygous) for 5 of 6 SNPs. However, SNP rs701848 shows a significant fraction of "T" reads, suggesting that P6 is heterozygous (C/T) for this SNP and exhibits subclonal copy number loss at this locus  
Allelic reads representing <0.5% of total read counts and likely to represent PCR error and were not considered "real"
